# Supplementary material
Source: publisher figshare collection journal article supplement (https://acs.figshare.com/ndownloader/files/10218609)
Supplement: Supplementary file 1 [file 10218609]

Compound	SMILES	Kd(uM)
benztropine	CN4[C@@H]1CC[C@H]4C[C@H](C1)OC(c2ccccc2)c3ccccc3	1300
bepridil	O(CC(C)C)CC(N1CCCC1)CN(c2ccccc2)Cc3ccccc3	290
paroxetine	c1cc(ccc1[C@@H]2CCNC[C@H]2COc3ccc4c(c3)OCO4)F	650
sertraline	ClC1=CC=C([C@H]2C3=C([C@H](CC2)NC)C=CC=C3)C=C1Cl	950
